# Supplementary material for: The Cognitive and Behavioral Phenotypes of Individuals with CHRNA7 Duplications
Source: Springer Nature journal article supplement (doi:10.1007/s10803-016-2961-8), 2016-11-16
Supplement: MOESM1 [file 11055246]

Fig. S1. Proportion of probands with dysmorphic features by presence of additional CNVs.
