# Supplementary material for: The Cognitive and Behavioral Phenotypes of Individuals with CHRNA7 Duplications
Source: Springer Nature journal article supplement (doi:10.1007/s10803-016-2961-8), 2016-11-16
Supplement: MOESM8 [file 11055246]

## Sheet: S3- Dev Hx
Supplementary Table S3. Age of Developmental Milestone Achievement.
Patient #	Sitting [mo]	Crawling [mo]	Walking [mo]	1st word [mo]	2 word sentences [mo]
1	unknown	unknown	19	17	47
2	5	unknown	9	24	60
3	6.5	8.5	13	10	30
4	normal	normal	normal	normal	normal
5	unknown	unknown	unknown	24	unknown
6	12	12	36	42	48
7	unknown	unknown	unknown	unknown	unknown
8	10	12	14	14	36
9	8	10	15	13	48
10	12	n/a	36	unknown	unknown
11	10	10	14	42	60
12	5	5	10	10	18
13	5	9	12	10	12
14	unknown	11	17	unknown	42
15	7	14	19	36	42
16	7	9	16	48	96
17	5	6	12	14	unknown
18	7	11	16	15	36
Average	7.65385	9.59091	17.2	22.7857	44.2308
